# Supplementary material for: Rapid implementation of Microsoft Teams in response to COVID-19: one acute healthcare organisation’s experience
Source: PubMed Central journal article supplement — BMJ Health Care Inform. 2020 Nov 11;27(3):e100209. doi: 10.1136/bmjhci-2020-100209 (PMC7661347; doi:10.1136/bmjhci-2020-100209), 2020-11-11
Supplement: bmjhci-2020-100209supp001.pdf [file bmjhci-2020-100209supp001.pdf]

## 1 Supplementary Data Sheet 1

| Date       | Active Users | Virtual Meetings | Private Chat Messages |
|------------|--------------|------------------|-----------------------|
| 18/03/2020 | 7            | 0                | 0                     |
| 19/03/2020 | 107          | 21               | 609                   |
| 20/03/2020 | 174          | 30               | 741                   |
| 21/03/2020 | 79           | 6                | 212                   |
| 22/03/2020 | 97           | 3                | 313                   |
| 23/03/2020 | 322          | 115              | 1451                  |
| 24/03/2020 | 381          | 132              | 1430                  |
| 25/03/2020 | 448          | 117              | 2510                  |
| 26/03/2020 | 475          | 117              | 2703                  |
| 27/03/2020 | 486          | 159              | 1777                  |
| 28/03/2020 | 143          | 12               | 254                   |
| 29/03/2020 | 155          | 2                | 286                   |
| 30/03/2020 | 642          | 186              | 2958                  |
| 31/03/2020 | 677          | 228              | 2936                  |
| 01/04/2020 | 703          | 227              | 2888                  |
| 02/04/2020 | 698          | 227              | 2955                  |
| 03/04/2020 | 735          | 244              | 3249                  |

|            |     |     |      |
|------------|-----|-----|------|
| 04/04/2020 | 210 | 7   | 147  |
| 05/04/2020 | 213 | 11  | 294  |
| 06/04/2020 | 746 | 286 | 3334 |
| 07/04/2020 | 721 | 321 | 3382 |
| 08/04/2020 | 752 | 469 | 3515 |
| 09/04/2020 | 735 | 304 | 2750 |
| 10/04/2020 | 404 | 139 | 1162 |
| 11/04/2020 | 208 | 27  | 316  |
| 12/04/2020 | 198 | 20  | 368  |
| 13/04/2020 | 431 | 113 | 1230 |
| 14/04/2020 | 805 | 305 | 2210 |
| 15/04/2020 | 810 | 383 | 3001 |
| 16/04/2020 | 805 | 310 | 3067 |
| 17/04/2020 | 786 | 344 | 3063 |
| 18/04/2020 | 256 | 20  | 299  |
| 19/04/2020 | 237 | 16  | 373  |
| 20/04/2020 | 825 | 317 | 2431 |
| 21/04/2020 | 818 | 285 | 2828 |

|            |      |     |      |
|------------|------|-----|------|
| 22/04/2020 | 883  | 402 | 2599 |
| 23/04/2020 | 878  | 375 | 2832 |
| 24/04/2020 | 869  | 341 | 2836 |
| 25/04/2020 | 239  | 10  | 106  |
| 26/04/2020 | 234  | 10  | 78   |
| 27/04/2020 | 853  | 282 | 2385 |
| 28/04/2020 | 866  | 374 | 2238 |
| 29/04/2020 | 979  | 458 | 2937 |
| 30/04/2020 | 923  | 395 | 3212 |
| 01/05/2020 | 844  | 351 | 2820 |
| 02/05/2020 | 254  | 25  | 70   |
| 03/05/2020 | 269  | 9   | 249  |
| 04/05/2020 | 969  | 351 | 2309 |
| 05/05/2020 | 1027 | 437 | 2746 |
| 06/05/2020 | 1033 | 533 | 3481 |
| 07/05/2020 | 1015 | 465 | 3154 |
| 08/05/2020 | 305  | 23  | 211  |
| 09/05/2020 | 222  | 14  | 198  |

|            |      |     |      |
|------------|------|-----|------|
| 10/05/2020 | 242  | 12  | 367  |
| 11/05/2020 | 980  | 355 | 2685 |
| 12/05/2020 | 1113 | 510 | 2950 |
| 13/05/2020 | 1162 | 654 | 3463 |
| 14/05/2020 | 1184 | 618 | 3347 |
| 15/05/2020 | 1070 | 459 | 3328 |
| 16/05/2020 | 299  | 9   | 310  |
| 17/05/2020 | 270  | 20  | 207  |
| 18/05/2020 | 1169 | 555 | 3358 |
| 19/05/2020 | 1261 | 691 | 4009 |
| 20/05/2020 | 1193 | 663 | 3931 |
| 21/05/2020 | 1256 | 640 | 3916 |
| 22/05/2020 | 1025 | 449 | 3307 |
| 23/05/2020 | 312  | 6   | 79   |
| 24/05/2020 | 225  | 18  | 114  |
| 25/05/2020 | 285  | 16  | 128  |
| 26/05/2020 | 1164 | 607 | 3042 |
| 27/05/2020 | 1230 | 691 | 3693 |

|            |      |      |      |
|------------|------|------|------|
| 28/05/2020 | 1260 | 630  | 4254 |
| 29/05/2020 | 1067 | 453  | 3489 |
| 30/05/2020 | 270  | 21   | 117  |
| 31/05/2020 | 258  | 26   | 24   |
| 01/06/2020 | 1214 | 583  | 4455 |
| 02/06/2020 | 1331 | 692  | 4863 |
| 03/06/2020 | 1394 | 858  | 3995 |
| 04/06/2020 | 1386 | 765  | 5418 |
| 05/06/2020 | 1277 | 645  | 4454 |
| 06/06/2020 | 283  | 13   | 140  |
| 07/06/2020 | 408  | 7    | 56   |
| 08/06/2020 | 1460 | 572  | 4038 |
| 09/06/2020 | 1379 | 837  | 4516 |
| 10/06/2020 | 1427 | 1014 | 4391 |
| 11/06/2020 | 1443 | 900  | 4853 |
| 12/06/2020 | 1284 | 655  | 3834 |
| 13/06/2020 | 287  | 11   | 198  |
| 14/06/2020 | 275  | 8    | 232  |

|            |      |      |      |
|------------|------|------|------|
| 15/06/2020 | 1332 | 649  | 4073 |
| 16/06/2020 | 1455 | 873  | 4293 |
| 17/06/2020 | 1512 | 1091 | 4604 |
| 18/06/2020 | 1426 | 954  | 4469 |
| 19/06/2020 | 1270 | 792  | 4612 |
| 20/06/2020 | 293  | 12   | 80   |
| 21/06/2020 | 268  | 12   | 66   |
| 22/06/2020 | 1400 | 700  | 3587 |
| 23/06/2020 | 1457 | 980  | 5192 |
| 24/06/2020 | 1525 | 1141 | 3886 |
| 25/06/2020 | 1469 | 1000 | 4125 |
| 26/06/2020 | 1295 | 814  | 3780 |
